# Supplementary material
Source: Springer Nature journal article supplement (https://www.springermedizin.de/resource/supplementary/12885_2008_1441_MOESM4_ESM.pdf/9472020)

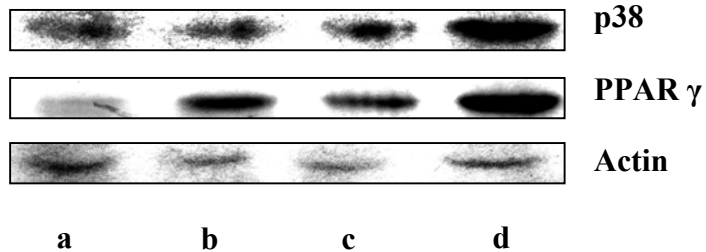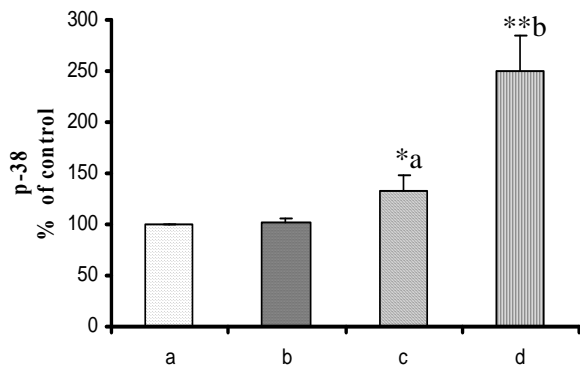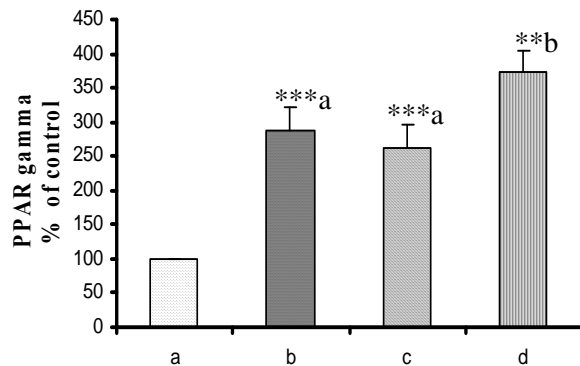

Supplement: MOESM4 [file 9472020]
